# Supplementary material
Source: publisher figshare collection journal article supplement (https://karger.figshare.com/ndownloader/files/35887115)
Supplement: Supplementary file 1 [file 35887115]

**SUPPLEMENTAL DATA**

**Supplemental file 1.** Transcriptions of the conversational exchanges in natural settings used for the analyses of the proband’s language in use.

**Supplemental file 2.** The whole set of genes important for language used for the in silico analysis.

**Supplemental file 3.** Data resulting from the microarray analyses comparing gene expression levels in the blood of the proband and her healthy parents.
